# Supplementary material for: Two-step epitaxial growth of NbON (100) thin films on rutile-type TiO2 (101) substrates and reduction of residual carrier concentration by RF reactive sputtering
Source: Royal Society of Chemistry journal article supplement (doi:10.1039/c9ce00478e), 2019-01-01
Supplement: c9ce00478e1.pdf [file c9ce00478e1.pdf]

Electronic Supplementary Information

# **Two-Step Epitaxial Growth of NbON (100) Thin Films on Rutile-Type TiO<sub>2</sub> (101) Substrates and Reduction of Residual Carrier Concentration by RF Reactive Sputtering**

Ryosuke Kikuchi\*, Toru Nakamura, Yasushi Kaneko and Kazuhito Hato  
Technology Innovation Division, Panasonic Corporation, Osaka, 570-8501,  
Japan

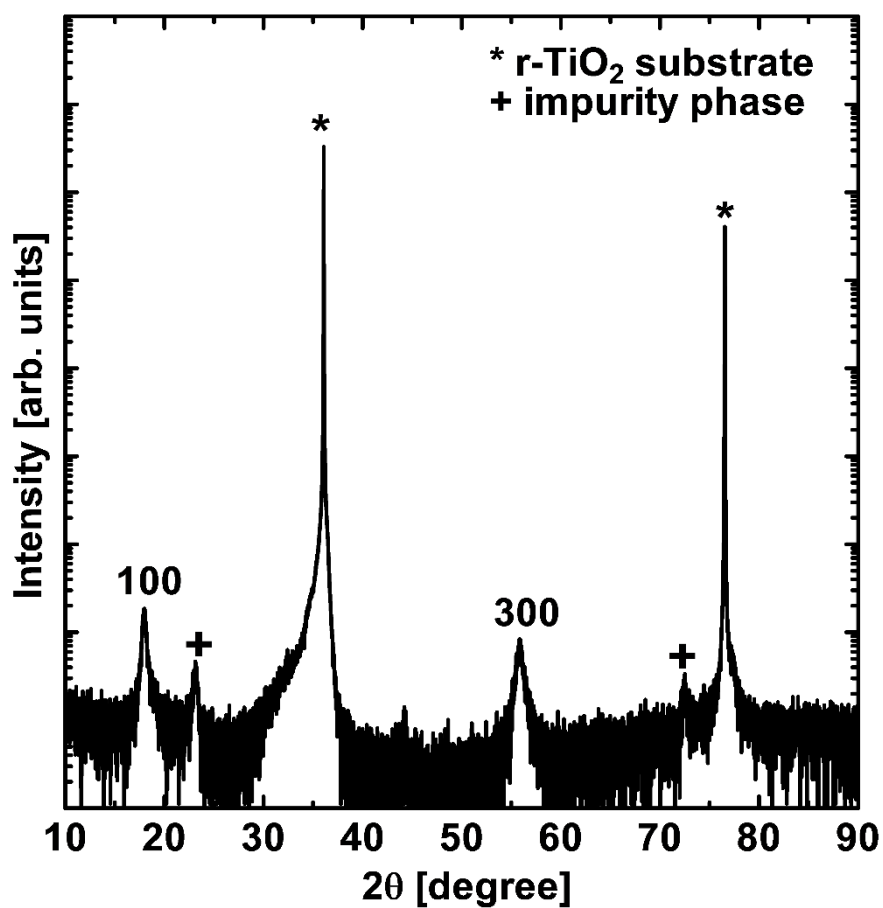

**Fig. S1**  $2\theta/\omega$  scan XRD profile of 1-step NbON film grown on r-TiO<sub>2</sub> (101) substrates. In this sample,  $f_{O_2}/[f_{O_2}+f_{N_2}]$  was set at 0.034 and the substrate temperature was 500°C. This profile shows weak peaks at h00 reflections and impurity peaks, suggesting that the orientation and crystalline quality had declined.

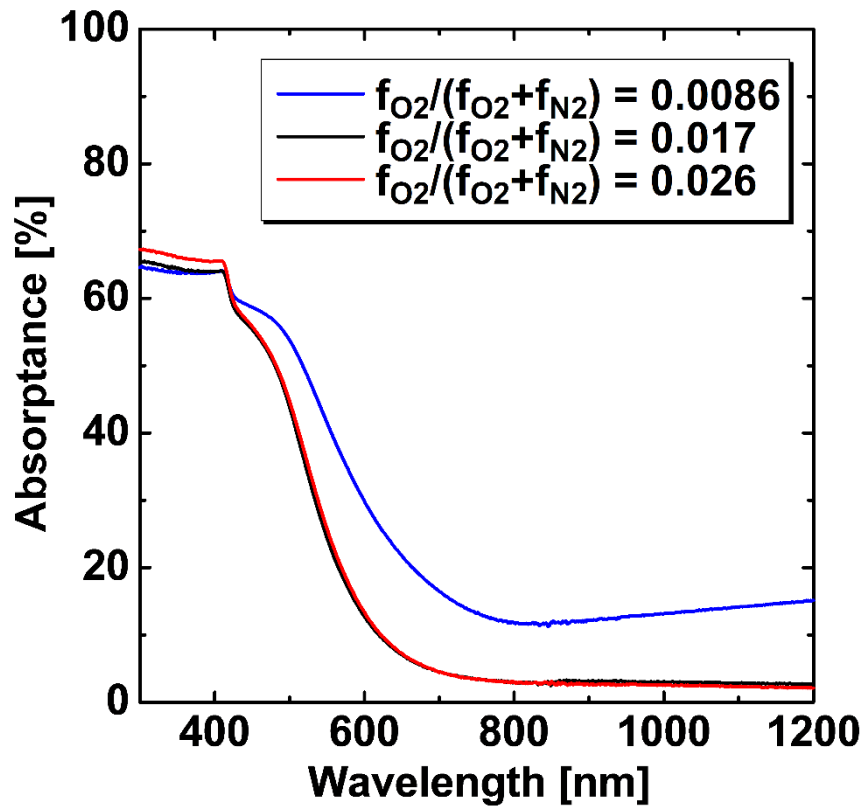

**Fig. S2** UV-Vis absorption spectra of 2-step NbON films grown on r-TiO<sub>2</sub> (101) substrates. In the 2-step layer of these samples,  $f_{O_2}/[f_{O_2}+f_{N_2}]$  was set at 0.0086, 0.017, and 0.026, and the substrate temperature was 500°C. Under O-poor growth condition ( $f_{O_2}/[f_{O_2}+f_{N_2}] = 0.0086$ ), we observed broad in-gap absorption from 800 to 1200 nm possibly due to formation of reduced Nb states. Under intermediate ( $f_{O_2}/[f_{O_2}+f_{N_2}] = 0.017$ ) and O-rich growth condition ( $f_{O_2}/[f_{O_2}+f_{N_2}] = 0.026$ ), the spectra showed clear absorption less than 600 nm corresponding to the band gap of NbON (2.1 eV).
